# Supplementary material for: On the morphological variability of Ichniotherium tracks and evolution of locomotion in the sistergroup of amniotes
Source: PeerJ journal article supplement (doi:10.7717/peerj.4346), 2018-01-31

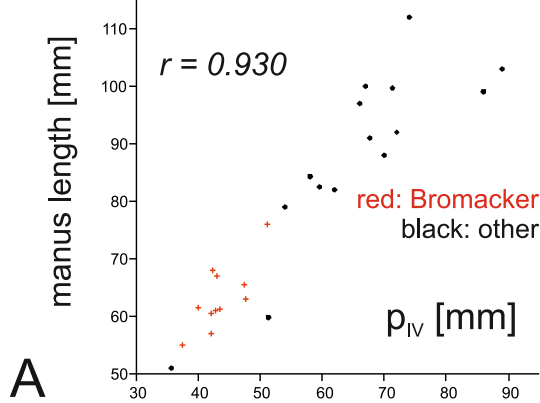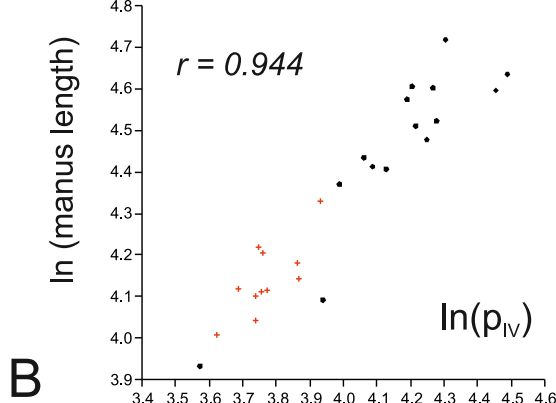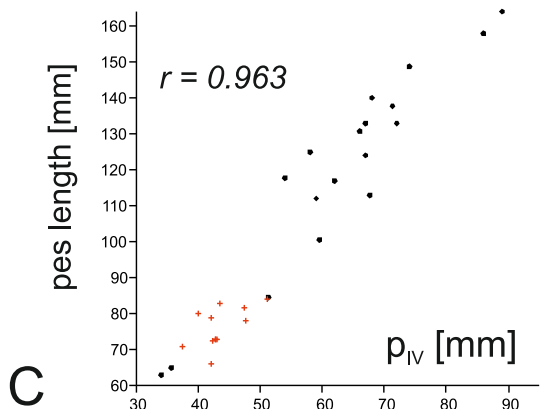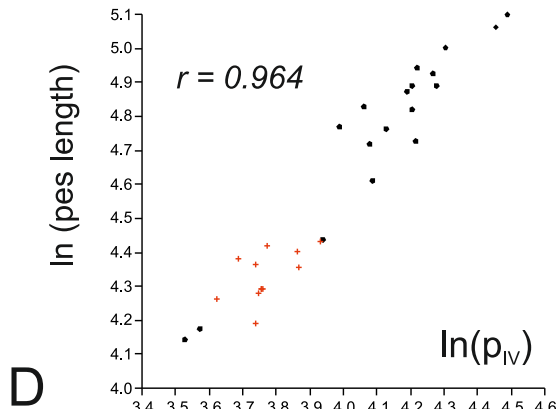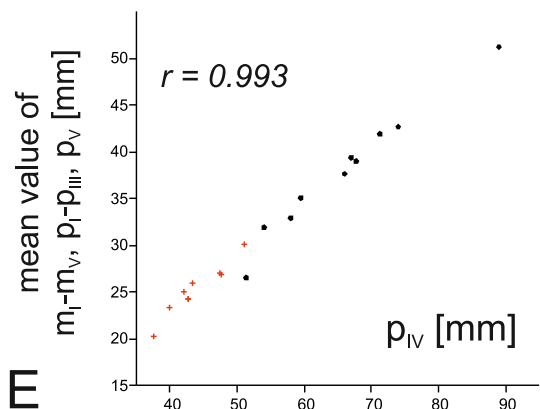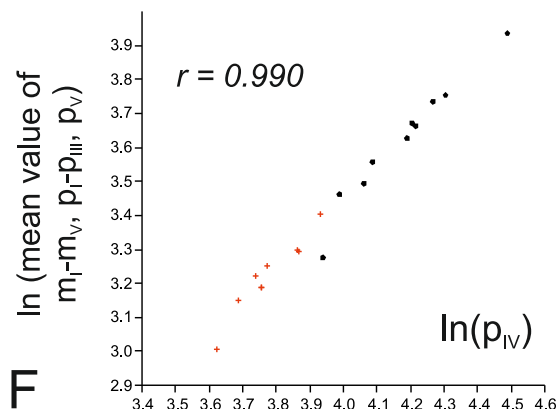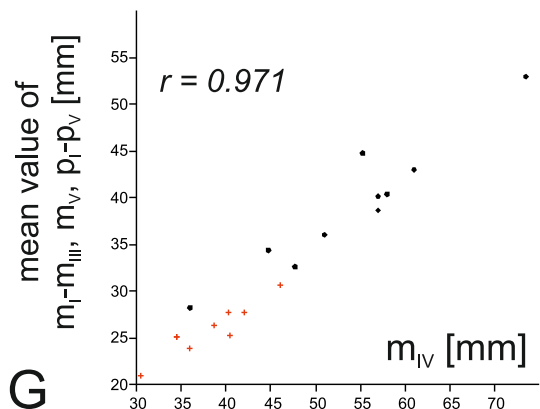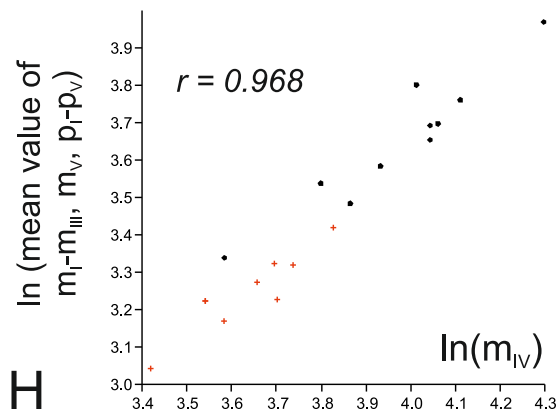

Supplement: Supplement_Fig_1_CMYK.pdf [file Supplement_Fig_1_CMYK.pdf]
