# Supplementary material for: On the morphological variability of Ichniotherium tracks and evolution of locomotion in the sistergroup of amniotes
Source: PeerJ journal article supplement (doi:10.7717/peerj.4346), 2018-01-31
Supplement: Supplement_Fig_2_CMYK.pdf [file Supplement_Fig_2_CMYK.pdf]

mode: based on covariance matrix

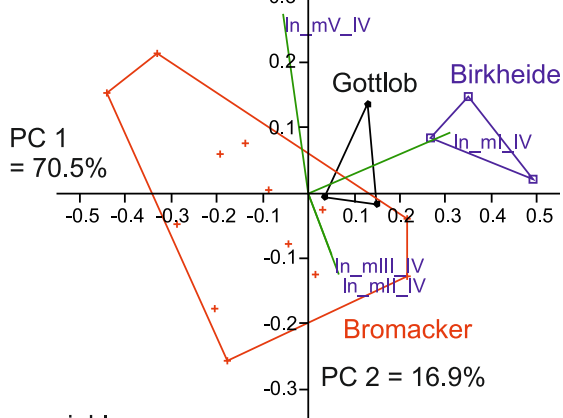

**A** variables:  $\ln(m_I/m_{IV}), \ln(m_{II}/m_{IV}), \ln(m_{III}/m_{IV}), \ln(m_V/m_{IV})$

mode: based on correlation matrix

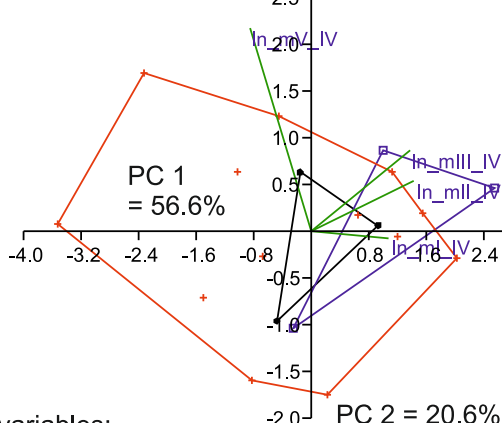

**B** variables:  $\ln(m_I/m_{IV}), \ln(m_{II}/m_{IV}), \ln(m_{III}/m_{IV}), \ln(m_V/m_{IV})$

mode: based on covariance matrix

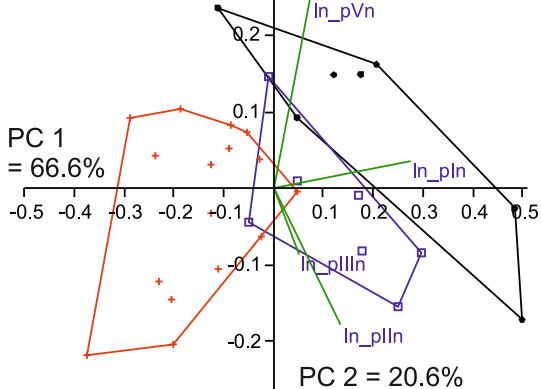

**C** variables:  $\ln(p_I(n)), \ln(p_{II}(n)), \ln(p_{III}(n)), \ln(p_V(n))$

mode: based on correlation matrix

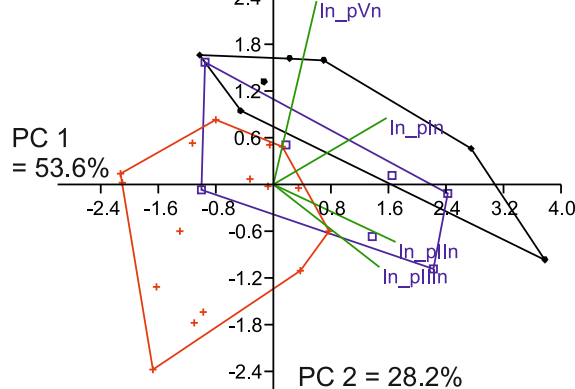

**D** variables:  $\ln(p_I(n)), \ln(p_{II}(n)), \ln(p_{III}(n)), \ln(p_V(n))$

mode: based on correlation matrix

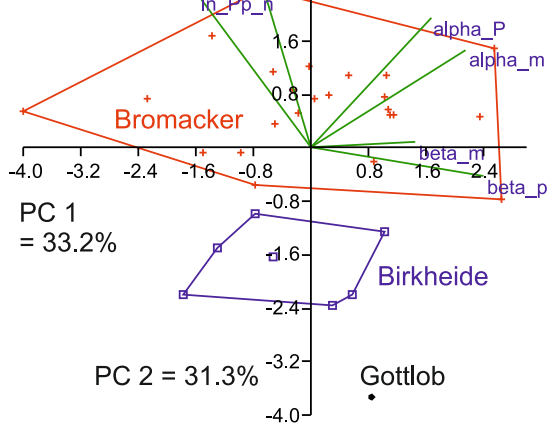

**E** variables:  $\ln(P_p(n)), \ln(C(n)), \alpha_p, \alpha_m, \beta_p, \beta_m$

mode: based on correlation matrix

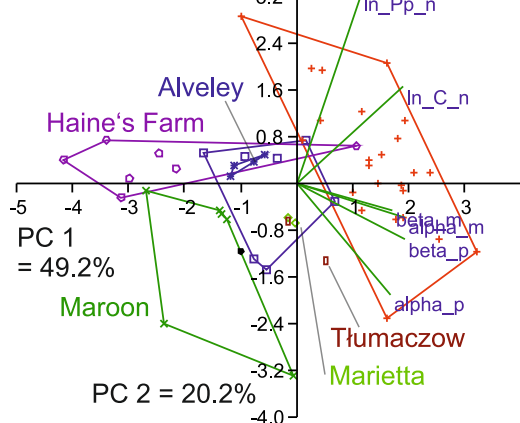

**F** variables:  $\ln(P_p(n)), \ln(C(n)), \alpha_p, \alpha_m, \beta_p, \beta_m$
