# Supplementary material for: On the morphological variability of Ichniotherium tracks and evolution of locomotion in the sistergroup of amniotes
Source: PeerJ. 2018 Jan 31;6:e4346. doi: 10.7717/peerj.4346 (PMC5797465; doi:10.7717/peerj.4346)
Supplement: Supplemental Information 1 [file peerj-06-4346-s001.xlsx]

## Sheet: Tabelle1
Specimen	Group	pIV	pV	pV/pIV
HF 57	I_cottae_Thuringia	68	33	0.485294
HF 89	I_cottae_Thuringia	70	37	0.528571
MNG 1381	I_cottae_Thuringia	62
MNG 1382	I_cottae_Thuringia	59	32	0.542373
MNG 1385	I_cottae_Thuringia	67	39	0.58209
MNG 1387	I_cottae_Thuringia	67	35	0.522388
MNG-1386-F1	I_cottae_Thuringia	72
MNG 1781	I_cottae_Thuringia	59.5	34.5	0.579832
MNG-2047	I_cottae_Thuringia
MNG-2049	I_cottae_Thuringia	58	28	0.482759
NHMS-AP-244-19	I_cottae_Thuringia	34	16	0.470588
NHMS-P-418	I_cottae_Thuringia	35.6	18.2	0.511236
MB.ICV.3-F1	I_cottae_Thuringia	42.8	21	0.490654
MB.ICV.3-F2	I_cottae_Thuringia	41
MNG-1352	I_cottae_Thuringia	51	23.6667	0.464052
MNG-1819	I_cottae_Thuringia	37.5	18	0.48
MNG-2356-16-F1	I_cottae_Thuringia	42.3333
MNG-2356-16-F2	I_cottae_Thuringia	43
MNG-10179	I_cottae_Thuringia	40	17	0.425
MSEO-I-36	I_cottae_Thuringia	42
PMJ-P-1321-F3	I_cottae_Thuringia	42	21	0.5
UGKU-F1	I_cottae_Thuringia	43.4	23.25	0.535714
UGKU-F2	I_cottae_Thuringia	47.5	21.3333	0.449123
SSB-1	I_cottae_Thuringia	47.6667	24	0.503497
OSU 16553	short_non_Thuringia	86
VP 3052	short_non_Thuringia	74	39.6667	0.536036
BU 2471	short_non_Thuringia	54	30.8333	0.570988
DMNS 50618	short_non_Thuringia	66	35.6667	0.540404
DMNS 50622	short_non_Thuringia	67.6667	39	0.576355
DMNS 55056	short_non_Thuringia	51.2857	26.6	0.518663
Marietta	short_non_Thuringia	89	42	0.47191
Kletno No.1	short_non_Thuringia	71.3333	42	0.588785
BGR-P-12539-F1	I_sphaerodactylum	44.5	35.6667	0.801498
BGR-P-12539-F2	I_sphaerodactylum
BUW-1	I_sphaerodactylum	46	40	0.869565
BUW-2-F1	I_sphaerodactylum	47	40	0.851064
BUW-2-F2	I_sphaerodactylum	46	36	0.782609
FG-525	I_sphaerodactylum	57.3333	44.5	0.776163
HF-51	I_sphaerodactylum	51.5	38.2	0.741748
HF-55	I_sphaerodactylum	47.6667	37	0.776224
HF-56	I_sphaerodactylum	39.3333	39.3333	1
HLMD-WT-297	I_sphaerodactylum	45.4	38	0.837004
LMJG-8491	I_sphaerodactylum	45.5	38.5	0.846154
MB.ICV.1	I_sphaerodactylum	56.3333	40.5	0.718935
MB.ICV.2	I_sphaerodactylum	46	36.5	0.793478
MB.ICV.4	I_sphaerodactylum	42.5714	32.8333	0.771253
MNG 1351	I_sphaerodactylum	51.25	38.6667	0.754472
MNG 1515-F1	I_sphaerodactylum	49.1667	42	0.854237
MNG 1515-F2	I_sphaerodactylum	49
MNG 1515-F3	I_sphaerodactylum	45.25	38.5	0.850829
MNG 1515-F4	I_sphaerodactylum	48.6667	39	0.80137
MNG-1840-F1	I_sphaerodactylum	49.8889	36.4	0.729621
MNG-1840-F2	I_sphaerodactylum	59.75	50	0.83682
MNG-2356-15	I_sphaerodactylum	63	46.5	0.738095
MNG-10072	I_sphaerodactylum	43.8571	34.6667	0.790445
MSEO-IIIA-519-F1	I_sphaerodactylum	51	42.75	0.838235
MSEO-IIIA-519-F2	I_sphaerodactylum	51.4	39.6	0.770428
MSEO-nn-2	I_sphaerodactylum
NHMM-2	I_sphaerodactylum	53	36	0.679245
NHMM-412	I_sphaerodactylum	54.5	45	0.825688
NHMS-I-Ba-18	I_sphaerodactylum	63.6667	51	0.801047
NHMS-1312	I_sphaerodactylum	61.5	43	0.699187
NHMW-1963-565	I_sphaerodactylum	45.8333	36.6667	0.8
PMJ-P-1321-F2	I_sphaerodactylum	53	44	0.830189
SMMGD-1354	I_sphaerodactylum	61.6667	50.5	0.818919
DMB	I_praesidentis	86.3636	70	0.810526
