# Supplementary material for: On the morphological variability of Ichniotherium tracks and evolution of locomotion in the sistergroup of amniotes
Source: PeerJ. 2018 Jan 31;6:e4346. doi: 10.7717/peerj.4346 (PMC5797465; doi:10.7717/peerj.4346)
Supplement: Supplemental Information 3 [file peerj-06-4346-s003.xlsx]

## Sheet: Tabelle1
Specimen	Couple_no	Locality	pI	pII	pIII	pIV	pV	mI	mII	mIII	mIV	mV	pes_length	manus_length	pIn	pIIn	pIIIn	pVn	mIn	mIIn	mIIIn	mIVn	mVn	mI_mIV	mII_mIV	mIII_mIV	mV_mIV
HF 57	1	Gottlob	40	55	65	68	33						140		0.588235	0.808824	0.955882	0.485294
HF 89	1	Gottlob	42	52	60	70	37		32	42	54	28		88	0.6	0.742857	0.857143	0.528571		0.457143	0.6	0.771429	0.4		0.592593	0.777778	0.518519
MNG 1381	1	Gottlob	37	44	55	62		22	35	44	51	25	117	82	0.596774	0.709677	0.887097		0.354839	0.564516	0.709677	0.822581	0.403226	0.431373	0.686275	0.862745	0.490196
MNG 1382	1	Gottlob	27	33	46	59	32						112		0.457627	0.559322	0.779661	0.542373
MNG 1385	1	Gottlob	32	40	54	67	39	23	34	47	58	27	133	100	0.477612	0.597015	0.80597	0.58209	0.343284	0.507463	0.701493	0.865672	0.402985	0.396552	0.586207	0.810345	0.465517
MNG 1387	1	Gottlob	28	39	51	67	35						124		0.41791	0.58209	0.761194	0.522388
MNG-1386-F1	1	Gottlob
MNG-1386-F1	2	Gottlob	35	46	59	71		25	36	44	50		142	92	0.492958	0.647887	0.830986		0.352113	0.507042	0.619718	0.704225		0.5	0.72	0.88
MNG-1386-F1	3	Gottlob	40	50	61	72		25	35	46	54		126		0.555556	0.694444	0.847222		0.347222	0.486111	0.638889	0.75		0.462963	0.648148	0.851852
MNG-1386-F1	4	Gottlob	33	46	61	73							131		0.452055	0.630137	0.835616
MNG 1781	1	Gottlob	21	30	47	59	35	23	34	42	52	29	104	81	0.355932	0.508475	0.79661	0.59322	0.389831	0.576271	0.711864	0.881356	0.491525	0.442308	0.653846	0.807692	0.557692
MNG 1781	2	Gottlob	28	36	46	60	34	21	32		50	29	97	84	0.466667	0.6	0.766667	0.566667	0.35	0.533333		0.833333	0.483333	0.42	0.64		0.58
MNG-2047	1	Birkheide											77
MNG-2047	2	Birkheide											77
MNG-2047	3	Birkheide											75
MNG-2047	4	Birkheide											80
MNG-2049	1	Birkheide						24	29	39	44	24		85										0.545455	0.659091	0.886364	0.545455
MNG-2049	2	Birkheide	22	32	44	57		27	34	41	45	22	125	85	0.385965	0.561404	0.77193		0.473684	0.596491	0.719298	0.789474	0.385965	0.6	0.755556	0.911111	0.488889
MNG-2049	3	Birkheide	27	39	52	59	28	23	25	37	45	21	125	83	0.457627	0.661017	0.881356	0.474576	0.389831	0.423729	0.627119	0.762712	0.355932	0.511111	0.555556	0.822222	0.466667
NHMS-AP-244-19	1	Birkheide
NHMS-AP-244-19	2	Birkheide	15	25	28	32	17	10	18	20	24		60		0.46875	0.78125	0.875	0.53125	0.3125	0.5625	0.625	0.75		0.416667	0.75	0.833333
NHMS-AP-244-19	3	Birkheide	13	21		36		12					66		0.361111	0.583333			0.333333
NHMS-AP-244-19	4	Birkheide	12	19	25		15
NHMS-P-418	1	Birkheide	14	21	26	36	20		12	21	28		63		0.388889	0.583333	0.722222	0.555556		0.333333	0.583333	0.777778			0.428571	0.75
NHMS-P-418	2	Birkheide	15	24	31	35	19						60		0.428571	0.685714	0.885714	0.542857
NHMS-P-418	3	Birkheide						10
NHMS-P-418	4	Birkheide											66
NHMS-P-418	5	Birkheide	14	24	28	36	19		15	24			67		0.388889	0.666667	0.777778	0.527778		0.416667	0.666667
NHMS-P-418	6	Birkheide	16	25	31	34	16	15	20	23	26		66	51	0.470588	0.735294	0.911765	0.470588	0.441176	0.588235	0.676471	0.764706		0.576923	0.769231	0.884615
NHMS-P-418	7	Birkheide	14	23	27	37	17	11	15	20			68		0.378378	0.621622	0.72973	0.459459	0.297297	0.405405	0.540541
NHMS-P-418	8	Birkheide
MB.ICV.3-F1	1	Bromacker								28	35															0.8
MB.ICV.3-F1	2	Bromacker	16	26	36	49	23				37				0.326531	0.530612	0.734694	0.469388				0.755102
MB.ICV.3-F1	3	Bromacker	15	27	38	46	19	15	23	28	38	17	72		0.326087	0.586957	0.826087	0.413043	0.326087	0.5	0.608696	0.826087	0.369565	0.394737	0.605263	0.736842	0.447368
MB.ICV.3-F1	4	Bromacker	14	21	35	44	21	16	26	33	36	16	77	61	0.318182	0.477273	0.795455	0.477273	0.363636	0.590909	0.75	0.818182	0.363636	0.444444	0.722222	0.916667	0.444444
MB.ICV.3-F1	5	Bromacker	11	27	32	36			27	31	33	18			0.305556	0.75	0.888889			0.75	0.861111	0.916667	0.5		0.818182	0.939394	0.545455
MB.ICV.3-F1	6	Bromacker	15	27	37
MB.ICV.3-F1	7	Bromacker	13	27	34	39				28	38		70		0.333333	0.692308	0.871795				0.717949	0.974359				0.736842
MB.ICV.3-F2	1	Bromacker	14	25	34	41		11					73		0.341463	0.609756	0.829268		0.268293
MB.ICV.3-F2	2	Bromacker	14	27	37			12	24	32	37													0.324324	0.648649	0.864865
MB.ICV.3-F2	3	Bromacker	15	25	34	41		11			38	19	73		0.365854	0.609756	0.829268		0.268293			0.926829	0.463415	0.289474			0.5
MNG-1352	1	Bromacker	18	34	45	51	26	14	29	38	49	24	87	79	0.352941	0.666667	0.882353	0.509804	0.27451	0.568627	0.745098	0.960784	0.470588	0.285714	0.591837	0.77551	0.489796
MNG-1352	2	Bromacker	16	32	39	50	20			39	44	23	81		0.32	0.64	0.78	0.4			0.78	0.88	0.46			0.886364	0.522727
MNG-1352	3	Bromacker	17	34	46	52	25	13	32	43	45	22	84	73	0.326923	0.653846	0.884615	0.480769	0.25	0.615385	0.826923	0.865385	0.423077	0.288889	0.711111	0.955556	0.488889
MNG-1819	1	Bromacker
MNG-1819	2	Bromacker	13	22	33	38		11	21	27	30	14		56	0.342105	0.578947	0.868421		0.289474	0.552632	0.710526	0.789474	0.368421	0.366667	0.7	0.9	0.466667
MNG-1819	3	Bromacker		17	21	37	18		20	26	31	17	71	54		0.459459	0.567568	0.486486		0.540541	0.702703	0.837838	0.459459		0.645161	0.83871	0.548387
MNG-2356-16-F1	1	Bromacker	16	29	35	41		13		33	40	22	72		0.390244	0.707317	0.853659		0.317073		0.804878	0.97561	0.536585	0.325		0.825	0.55
MNG-2356-16-F1	2	Bromacker								32	39	23	71													0.820513	0.589744
MNG-2356-16-F1	3	Bromacker								32	43			68												0.744186
MNG-2356-16-F1	4	Bromacker	16	21	36	42			26	32			74		0.380952	0.5	0.857143			0.619048	0.761905
MNG-2356-16-F1	5	Bromacker		28	34	44										0.636364	0.772727
MNG-2356-16-F2	1	Bromacker
MNG-2356-16-F2	2	Bromacker	13	23	34	42				30	42			67	0.309524	0.547619	0.809524				0.714286	1				0.714286
MNG-2356-16-F2	3	Bromacker	18	31	38	44		12					71		0.409091	0.704545	0.863636		0.272727
MNG-2356-16-F2	4	Bromacker			36	43			27		39		75				0.837209			0.627907		0.906977			0.692308
MNG-2356-16-F2	5	Bromacker	19	31	40			12
MNG-10179	1	Bromacker						13	22	32	34			58										0.382353	0.647059	0.941176
MNG-10179	2	Bromacker	12	26	36	44	17	10				19	83		0.272727	0.590909	0.818182	0.386364	0.227273				0.431818
MNG-10179	3	Bromacker				37		11	23	29	42	25	78	65					0.297297	0.621622	0.783784	1.13514	0.675676	0.261905	0.547619	0.690476	0.595238
MNG-10179	4	Bromacker	12	26	33	39							79		0.307692	0.666667	0.846154
MNG-10179	5	Bromacker							20	28	32														0.625	0.875
MSEO-I-36	1	Bromacker	19		36								79
MSEO-I-36	2	Bromacker	20	30	35	42		15	24	29	33	16		60	0.47619	0.714286	0.833333		0.357143	0.571429	0.690476	0.785714	0.380952	0.454545	0.727273	0.878788	0.484848
MSEO-I-36	3	Bromacker	17	32	35	40							78		0.425	0.8	0.875
MSEO-I-36	4	Bromacker	14	28	35	44			17	25	35	18	79	61	0.318182	0.636364	0.795455			0.386364	0.568182	0.795455	0.409091		0.485714	0.714286	0.514286
PMJ-P-1321-F3	1	Bromacker	16	29	34	42							65		0.380952	0.690476	0.809524
PMJ-P-1321-F3	2	Bromacker								32	41															0.780488
PMJ-P-1321-F3	3	Bromacker	17	26	35	42	21	12	26	33	40	16	67	57	0.404762	0.619048	0.833333	0.5	0.285714	0.619048	0.785714	0.952381	0.380952	0.3	0.65	0.825	0.4
PMJ-P-1321-F3	4	Bromacker	15	25
UGKU-F1	1	Bromacker
UGKU-F1	2	Bromacker	15	27	34	42	23	13	28				88		0.357143	0.642857	0.809524	0.547619	0.309524	0.666667
UGKU-F1	3	Bromacker	17	27	42	48	25	13	26	33	41	23	79	62	0.354167	0.5625	0.875	0.520833	0.270833	0.541667	0.6875	0.854167	0.479167	0.317073	0.634146	0.804878	0.560976
UGKU-F1	4	Bromacker	14	25	35	42	22	13	24	34	37	18	87	60	0.333333	0.595238	0.833333	0.52381	0.309524	0.571429	0.809524	0.880952	0.428571	0.351351	0.648649	0.918919	0.486486
UGKU-F1	5	Bromacker				43			26	36										0.604651	0.837209
UGKU-F1	6	Bromacker	15	25	35	42	23		26	31	38		78	62	0.357143	0.595238	0.833333	0.547619		0.619048	0.738095	0.904762			0.684211	0.815789
UGKU-F2	1	Bromacker
UGKU-F2	2	Bromacker	16	28	38	49	20	13	26	36	45	30	80	69	0.326531	0.571429	0.77551	0.408163	0.265306	0.530612	0.734694	0.918367	0.612245	0.288889	0.577778	0.8	0.666667
UGKU-F2	3	Bromacker											82
UGKU-F2	4	Bromacker									40	27															0.675
UGKU-F2	5	Bromacker			34		21			35	39	18		62												0.897436	0.461538
UGKU-F2	6	Bromacker	14	27		46	23		29	37	44	25	81		0.304348	0.586957		0.5		0.630435	0.804348	0.956522	0.543478		0.659091	0.840909	0.568182
UGKU-F2	7	Bromacker											83
SSB-1	1	Bromacker						15	28	40	45	26												0.333333	0.622222	0.888889	0.577778
SSB-1	2	Bromacker	17	25	36	46	20	14	24	33	40	20	79	62	0.369565	0.543478	0.782609	0.434783	0.304348	0.521739	0.717391	0.869565	0.434783	0.35	0.6	0.825	0.5
SSB-1	3	Bromacker	15	29	39	49	28		25	33	36	22	78	64	0.306122	0.591837	0.795918	0.571429		0.510204	0.673469	0.734694	0.44898	0	0.694444	0.916667	0.611111
SSB-1	4	Bromacker	18	26	37	48	24	12	24				77		0.375	0.541667	0.770833	0.5	0.25	0.5
OSU 16553	1	Haines_Farm							51	56	63														0.809524	0.888889
OSU 16553	2	Haines_Farm	48	67	88	90				66			186		0.533333	0.744444	0.977778				0.733333
OSU 16553	3	Haines_Farm	40	54	73	86		34	44	53	69		150	92	0.465116	0.627907	0.848837		0.395349	0.511628	0.616279	0.802326		0.492754	0.637681	0.768116
OSU 16553	4	Haines_Farm	36	54	80	86		30	44	54	66		146	102	0.418605	0.627907	0.930233		0.348837	0.511628	0.627907	0.767442		0.454545	0.666667	0.818182
OSU 16553	5	Haines_Farm	36	58	73	82		29	47	56	68		158	97	0.439024	0.707317	0.890244		0.353659	0.573171	0.682927	0.829268		0.426471	0.691176	0.823529
OSU 16553	6	Haines_Farm	35	60	88	88		28	42	58	65		151	103	0.397727	0.681818	1		0.318182	0.477273	0.659091	0.738636		0.430769	0.646154	0.892308
OSU 16553	7	Haines_Farm	39	55	80	87		34	50	59	67		154	101	0.448276	0.632184	0.91954		0.390805	0.574713	0.678161	0.770115		0.507463	0.746269	0.880597
OSU 16553	8	Haines_Farm	38	57	77	80		37	46	58	68		158	102	0.475	0.7125	0.9625		0.4625	0.575	0.725	0.85		0.544118	0.676471	0.852941
OSU 16553	9	Haines_Farm	37	54	79	89		29	44	54	69		160	97	0.41573	0.606742	0.88764		0.325843	0.494382	0.606742	0.775281		0.42029	0.637681	0.782609
VP 3052	1	Haines_Farm						30	36	44	56	26		111										0.535714	0.642857	0.785714	0.464286
VP 3052	2	Haines_Farm	38	46	66	73	38	27	39	52	57	30	147	115	0.520548	0.630137	0.90411	0.520548	0.369863	0.534247	0.712329	0.780822	0.410959	0.473684	0.684211	0.912281	0.526316
VP 3052	3	Haines_Farm	40	46	59	69	38	25	36	46	53	29	147	110	0.57971	0.666667	0.855072	0.550725	0.362319	0.521739	0.666667	0.768116	0.42029	0.471698	0.679245	0.867925	0.54717
VP 3052	4	Haines_Farm	41	46	65	80	43						152		0.5125	0.575	0.8125	0.5375
BU 2471	1	Alveley		34	46	57	31				40	20	120	78		0.596491	0.807018	0.54386				0.701754	0.350877				0.5
BU 2471	2	Alveley	22	35	45	55	30	20	27	35	49	26	119		0.4	0.636364	0.818182	0.545455	0.363636	0.490909	0.636364	0.890909	0.472727	0.408163	0.55102	0.714286	0.530612
BU 2471	3	Alveley	25	35	41	52	30	20					116	82	0.480769	0.673077	0.788462	0.576923	0.384615
BU 2471	4	Alveley	24	32	43	54	29	20	28		54	29	116	77	0.444444	0.592593	0.796296	0.537037	0.37037	0.518519		1	0.537037	0.37037	0.518519		0.537037
BU 2471	5	Alveley	28	42	52	58	38	20	28	38			118		0.482759	0.724138	0.896552	0.655172	0.344828	0.482759	0.655172
BU 2471	6	Alveley	18	24	40	48	27	19	24	33			118		0.375	0.5	0.833333	0.5625	0.395833	0.5	0.6875
DMNS 50618	1	Maroon		39	58	70		22	31	41	51	27		93		0.557143	0.828571		0.314286	0.442857	0.585714	0.728571	0.385714	0.431373	0.607843	0.803922	0.529412
DMNS 50618	2	Maroon					36	23	27	46	64	32	138	105										0.359375	0.421875	0.71875	0.5
DMNS 50618	3	Maroon	27	39	50	67	37		32	46	56	33	132	93	0.402985	0.58209	0.746269	0.552239		0.477612	0.686567	0.835821	0.492537		0.571429	0.821429	0.589286
DMNS 50618	4	Maroon		35	55	61	34		29			29	122			0.57377	0.901639	0.557377		0.47541			0.47541
DMNS 50622	1	Maroon		40									114	95
DMNS 50622	2	Maroon	22	41	55	65	39	18		50	57		111	87	0.338462	0.630769	0.846154	0.6	0.276923		0.769231	0.876923		0.315789		0.877193
DMNS 50622	3	Maroon	27	41	57	70		22	33	48		30	115		0.385714	0.585714	0.814286		0.314286	0.471429	0.685714		0.428571
DMNS 50622	4	Maroon	28	41	54	68			36	47	57		112		0.411765	0.602941	0.794118			0.529412	0.691176	0.838235			0.631579	0.824561
DMNS 55056	1	Maroon		28	38	51	26	16	27	32	38	17	84	62		0.54902	0.745098	0.509804	0.313725	0.529412	0.627451	0.745098	0.333333	0.421053	0.710526	0.842105	0.447368
DMNS 55056	2	Maroon	19	28	42	50	28	11	19	31	34	18	82	58	0.38	0.56	0.84	0.56	0.22	0.38	0.62	0.68	0.36	0.323529	0.558824	0.911765	0.529412
DMNS 55056	3	Maroon	18	26	42	52		14	21	29	37		82	58	0.346154	0.5	0.807692		0.269231	0.403846	0.557692	0.711538		0.378378	0.567568	0.783784
DMNS 55056	4	Maroon	19	30	41	50	23	14	26	33	35	15	82	61	0.38	0.6	0.82	0.46	0.28	0.52	0.66	0.7	0.3	0.4	0.742857	0.942857	0.428571
DMNS 55056	5	Maroon	19	31	42	53	26						94		0.358491	0.584906	0.792453	0.490566
DMNS 55056	6	Maroon	20	31	41	52	30	15		30			86		0.384615	0.596154	0.788462	0.576923	0.288462		0.576923
DMNS 55056	7	Maroon	24	33	43	51							82		0.470588	0.647059	0.843137
Marietta	1	Oklahoma	37	62	77
Marietta	2	Oklahoma	40	58	72	86	42	26	45	52	70	39	160	103	0.465116	0.674419	0.837209	0.488372	0.302326	0.523256	0.604651	0.813953	0.453488	0.371429	0.642857	0.742857	0.557143
Marietta	3	Oklahoma	39	61	72	86			42	54	69		157		0.453488	0.709302	0.837209			0.488372	0.627907	0.802326			0.608696	0.782609
Marietta	4	Oklahoma	38	63	82	96				67	80		183		0.395833	0.65625	0.854167				0.697917	0.833333				0.8375
Marietta	5	Oklahoma	38	56	67	88		36	43	58	75	43	156		0.431818	0.636364	0.761364		0.409091	0.488636	0.659091	0.852273	0.488636	0.48	0.573333	0.773333	0.573333
Kletno No.1	1	Tlumaczow
Kletno No.1	2	Tlumaczow	30	43	61	72	43	22	40	50	65	34	137	110	0.416667	0.597222	0.847222	0.597222	0.305556	0.555556	0.694444	0.902778	0.472222	0.338462	0.615385	0.769231	0.523077
Kletno No.1	3	Tlumaczow	28	39	55	68	41	18	39	50	58	29	140	88	0.411765	0.573529	0.808824	0.602941	0.264706	0.573529	0.735294	0.852941	0.426471	0.310345	0.672414	0.862069	0.5
Kletno No.1	4	Tlumaczow	28	43	62	74	42	24	37	46	60	44	142	101	0.378378	0.581081	0.837838	0.567568	0.324324	0.5	0.621622	0.810811	0.594595	0.4	0.616667	0.766667	0.733333
